# Supplementary material for: Fluorine and nitrogen co-doped ordered mesoporous carbon as a metal-free electrocatalyst for oxygen reduction reaction
Source: Royal Society of Chemistry journal article supplement (doi:10.1039/c6ra14748h), 2016-01-01

**Fluorine and nitrogen co-doped ordered mesoporous carbon as metal-free  
electrocatalyst for oxygen reduction reaction**

Haiwen Wang<sup>a\*</sup>, Junjie Ding<sup>a</sup>, Jiao Zhang<sup>a</sup>, Chenfei Wang<sup>a</sup>, Wenlong Yang<sup>b</sup>,

Hongxin Ren<sup>a</sup>, Aiguo kong<sup>c\*</sup>

*1 School of Chemistry and Molecular Engineering, East China University of Science  
and Technology, Shanghai 200237, PR China*

*2 Department of Materials Science and Engineering, College Peking University,  
Beijing 100871, PR China*

*3 Department of Chemistry, East China Normal University, Shanghai 200241, PR  
China*

## Supporting Information

**Fig.S1** Low-angle XRD patterns of FN-OMC-1100

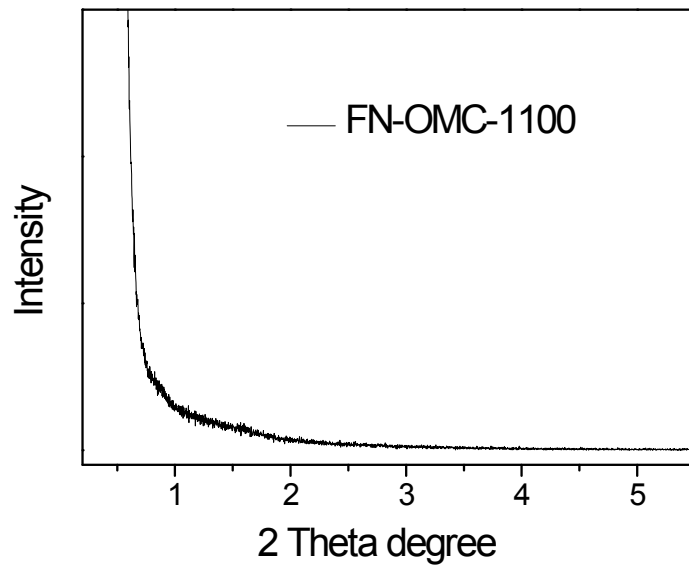

**Fig. S2** Energy Dispersive Spectrometer (EDS) mapping results for F and N element in ordered mesoporous FN-OMC-1000.

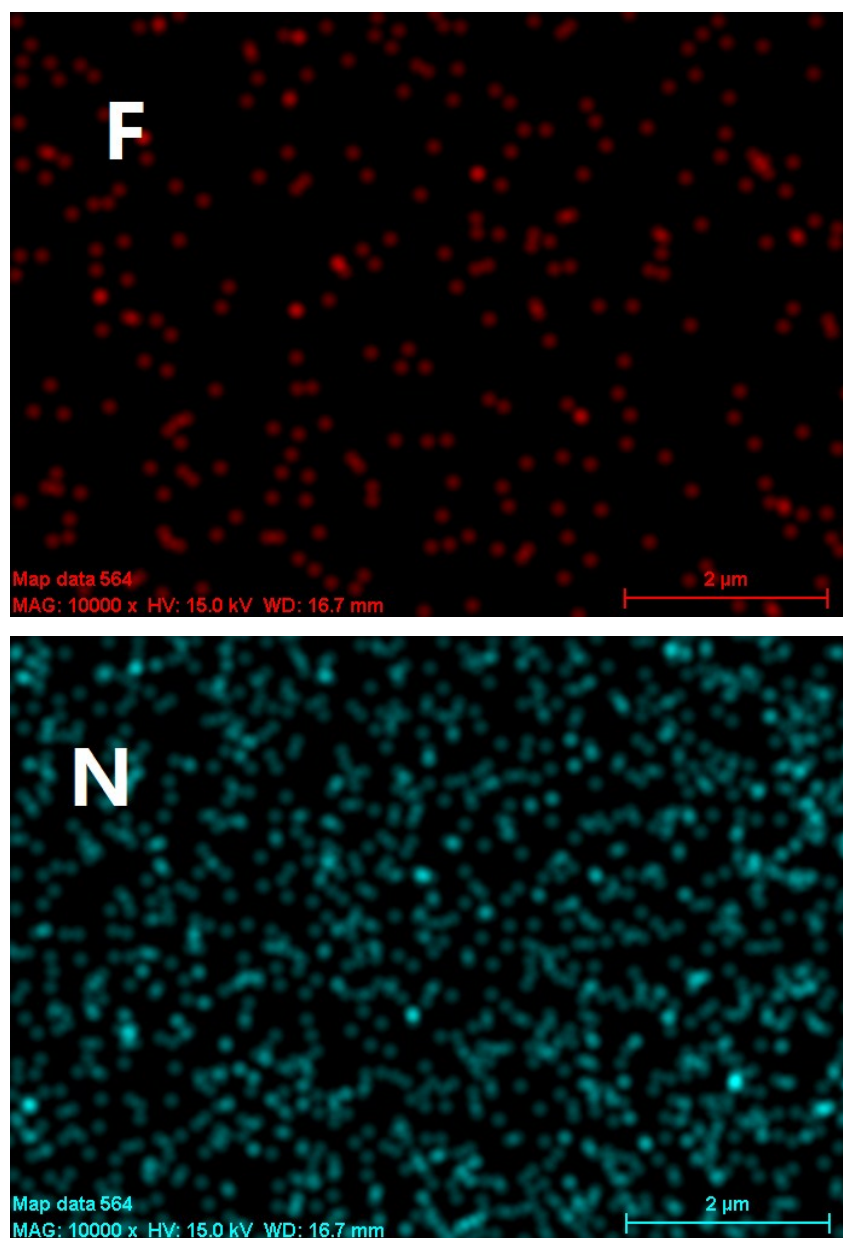

**Fig. S3** CV curves on mesoporous FN-OMC-1000 and OMC-1000 in O<sub>2</sub> saturated 0.1 M KOH solution at a scan rate of 10 mV s<sup>-1</sup>

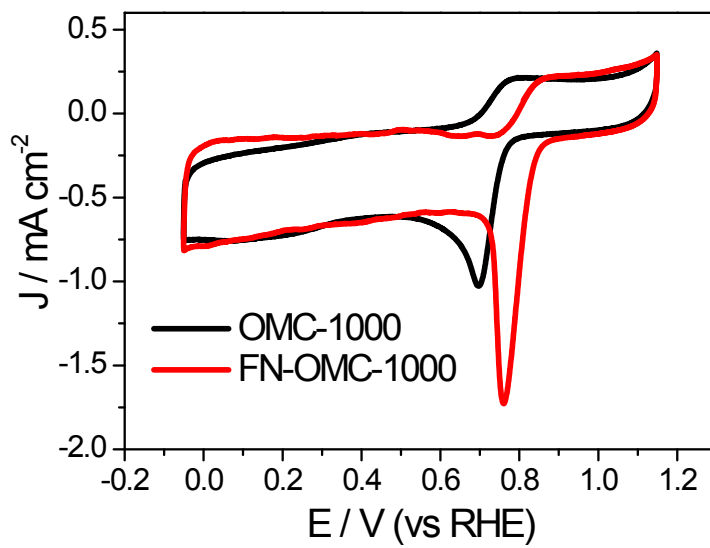

Supplement: c6ra14748h1.pdf [file c6ra14748h1.pdf]
